# Supplementary material for: Detection of Species Substitution in the Meat Value Chain by High-Resolution Melting Analysis of Mitochondrial PCR Products
Source: MDPI journal article supplement (doi:10.3390/foods10123090), 2021-12-13
Supplement: s1 [file s1]

**Supplementary Table S1: Metadata of voucher specimen.** Metadata of voucher specimen used as positive controls in this study. Meat samples from known vertebrate species selected for use as positive controls in the PCR-HRM analyses.

| Species           | Scientific name                 | Origin of sample | GPS Address                  | Reference           | No. of replicates |
|-------------------|---------------------------------|------------------|------------------------------|---------------------|-------------------|
| <b>Chicken</b>    | <i>Gallus gallus domesticus</i> | icipe            | 1°13'13.8"S,<br>36°53'48.7"E | (Ouso et al., 2020) | 3                 |
| <b>Goat</b>       | <i>Capra hircus</i>             | icipe            | 1°13'13.8"S,<br>36°53'48.7"E | (Ouso et al., 2020) | 3                 |
| <b>Rabbit</b>     | <i>Oryctolagus cuniculus</i>    | icipe insectary  | 1°13'13.8"S,<br>36°53'48.7"E | -                   | 3                 |
| <b>Cattle</b>     | <i>Bos taurus</i>               | icipe            | 1°13'13.8"S,<br>36°53'48.7"E | (Ouso et al., 2020) | 3                 |
| <b>Pig</b>        | <i>Sus scrofa domesticus</i>    | icipe            | 1°13'13.8"S,<br>36°53'48.7"E | (Ouso et al., 2020) | 3                 |
| <b>Camel</b>      | <i>Camelus dromedarius</i>      | icipe            | 1°13'13.8"S,<br>36°53'48.7"E | -                   | 3                 |
| <b>Sheep</b>      | <i>Ovis aries</i>               | icipe            | 1°13'13.8"S,<br>36°53'48.7"E | (Ouso et al., 2020) | 3                 |
| <b>Nile perch</b> | <i>Lates niloticus</i>          | icipe            | 1°13'13.8"S,<br>36°53'48.7"E | (Ouso et al., 2020) | 3                 |



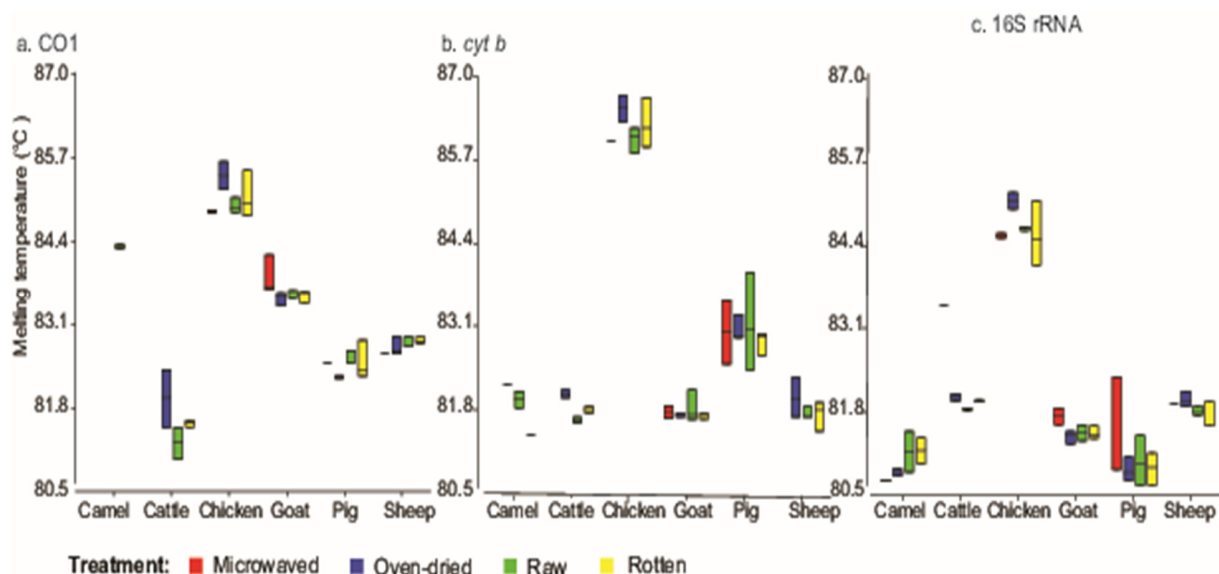

**Supplementary Figure S2: Box plots of peak melting temperatures (°C) of meat samples exposed to different physicochemical conditions.** Replicate meat samples from goat, sheep, pig, cattle, camel, and chicken were exposed to different conditions; raw, rotten, oven-dried, and microwaved. The peak PCR-HRM melt rate temperatures were plotted for a) *CO1*, b) *cyt b*, and c) *16S rRNA* markers.

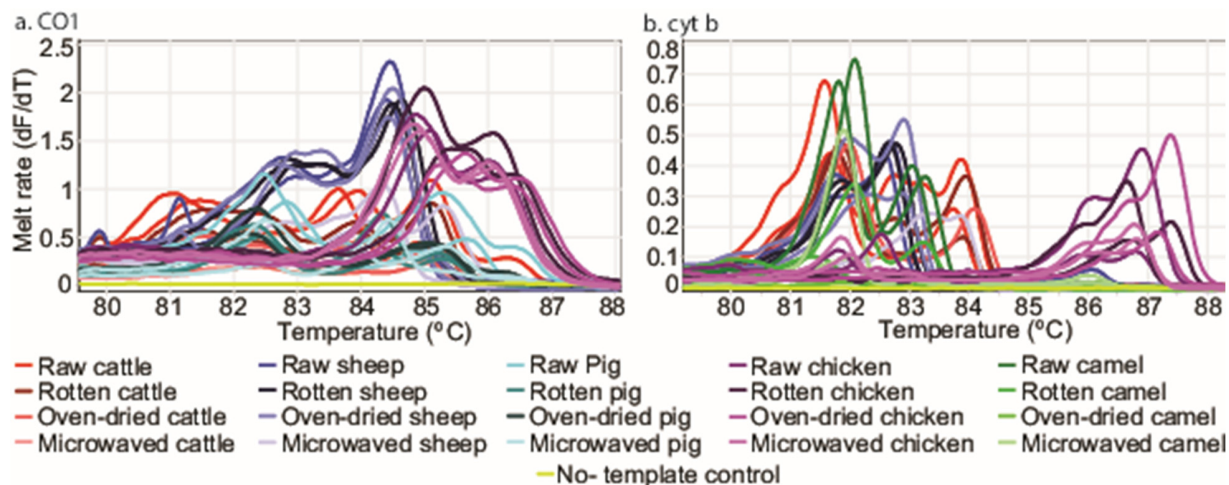

**Supplementary Figure S3: PCR-HRM profiles showing the distinction of species presenting with double peaks.** Unique double peaks produced by samples from cattle, sheep, pig, chicken and camel samples when targeting *cyt b* and *CO1* allowed for easier identification of these vertebrates. This differentiation relied on the melt profiles, through the analysis of multiple peaks produced in the amplification of a) *CO1* and b) *cyt b*.

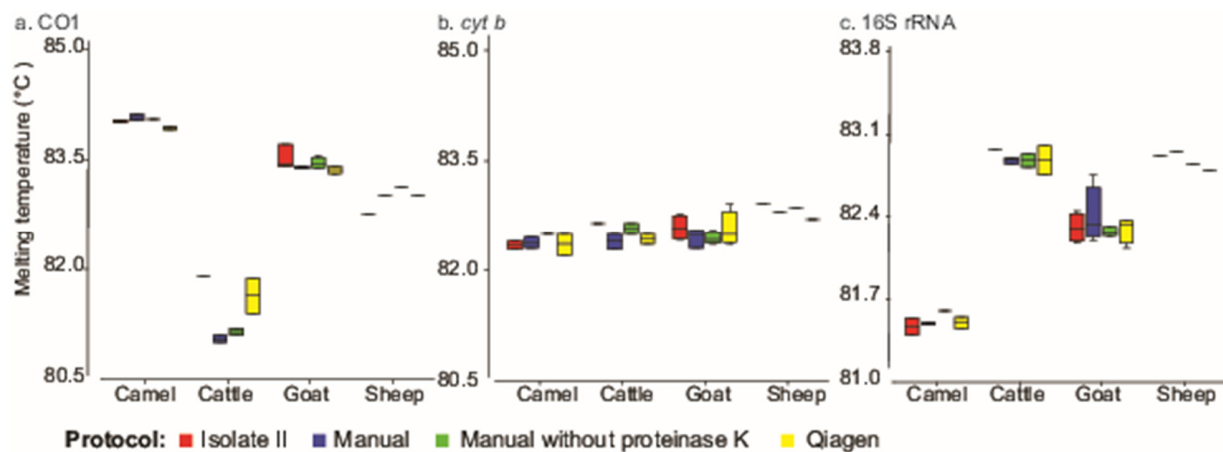

**Supplementary Figure S4: Box plots of peak melting temperature (°C) seen in meat samples extracted using different extraction protocols.** DNA from four vertebrate species (two cattle, four goats, one sheep and two camels) were extracted in replicate using two commercial kits; DNeasy Blood and Tissue Kit protocol, the ISOLATE II Genomic DNA Extraction Kit, and two manual extraction protocols. The peak PCR-HRM melt rate temperatures were plotted for a) *CO1*, b) *cyt b*, and c) *16S rRNA* markers.
